# Supplementary material for: Quantitative Proteomics Reveals Dynamic Interactions of the Minichromosome Maintenance Complex (MCM) in the Cellular Response to Etoposide Induced DNA Damage
Source: PubMed Central journal article supplement (PMC4587322; doi:10.1074/mcp.m115.048991), 2015-05-11

# Supplementary Figure 1

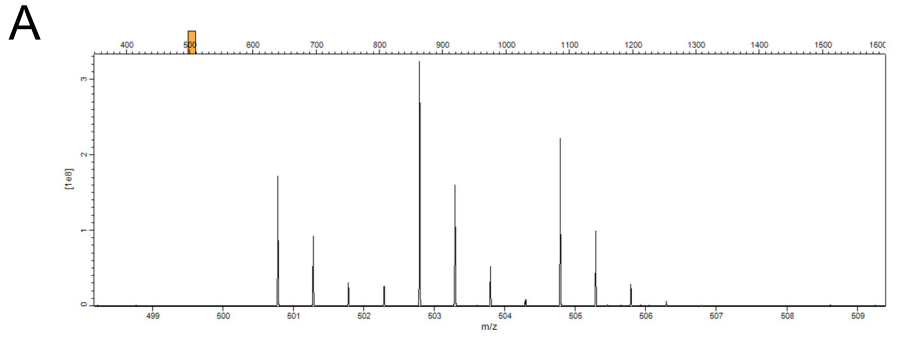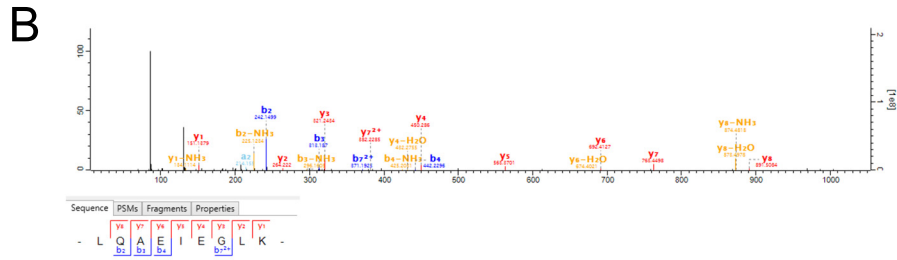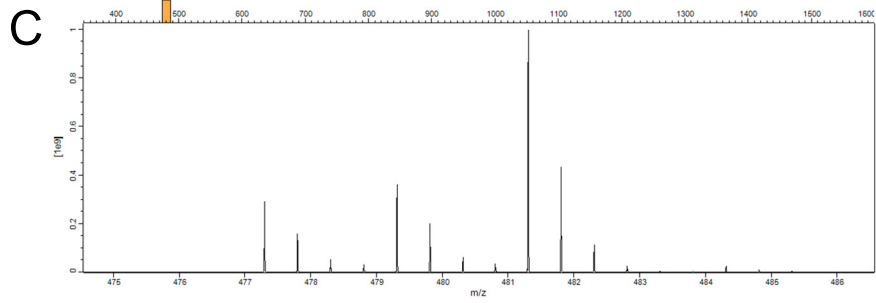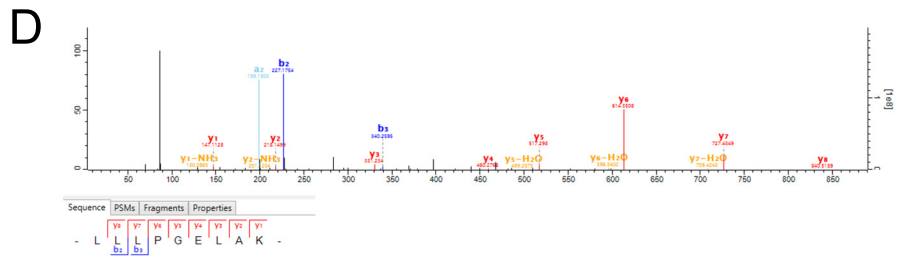

Supplementary Figure 2

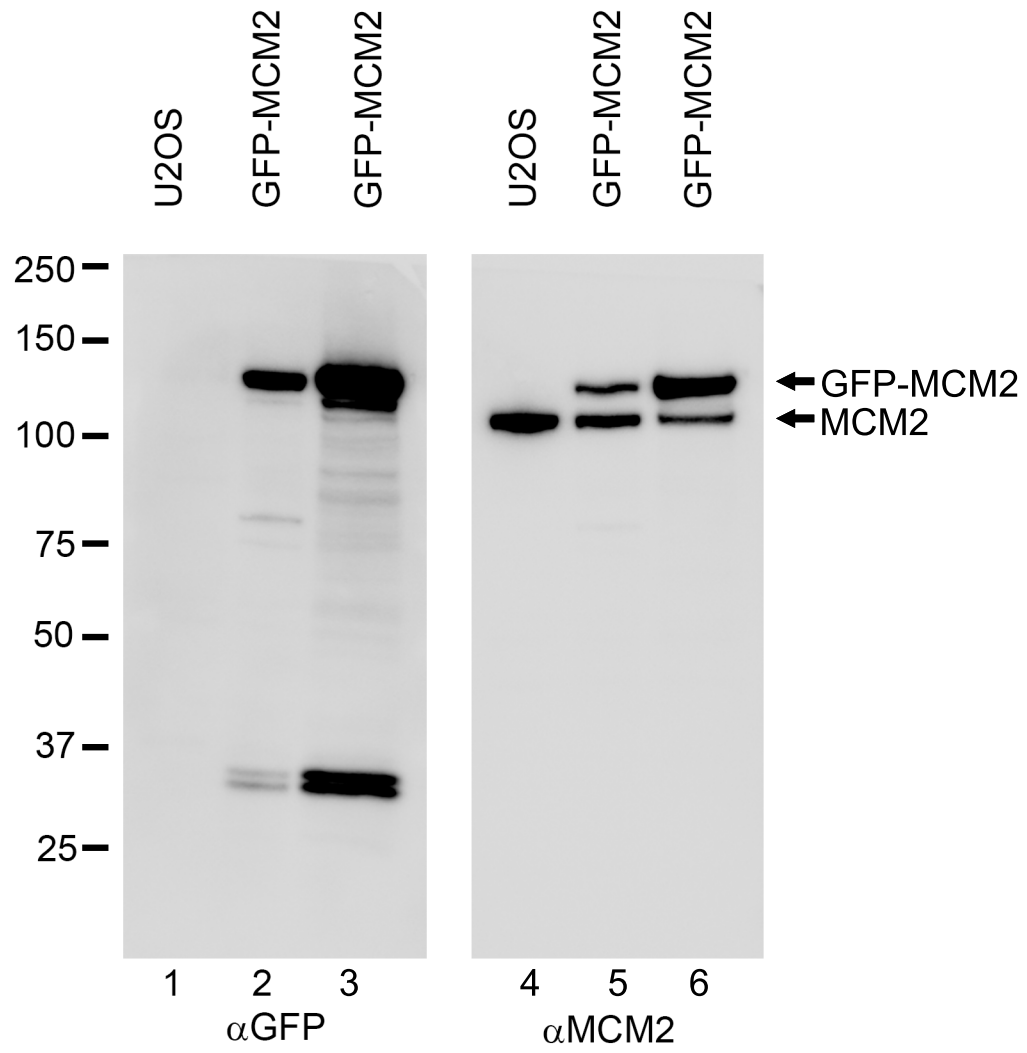

Supplementary Figure 3

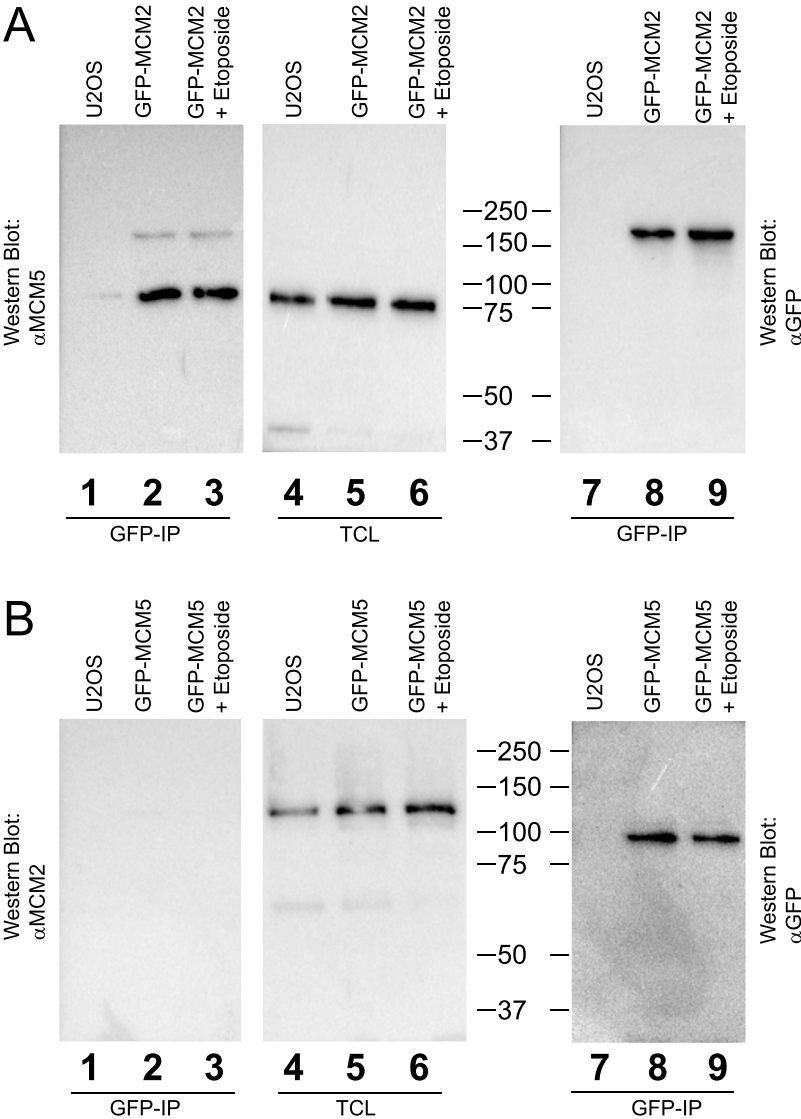

Supplement: supp_M115.048991_mcp.M115.048991-6.pdf [file supp_M115.048991_mcp.M115.048991-6.pdf]
